# Supplementary material for: Current Practice of Public Involvement Activities in Biomedical Research and Innovation: A Systematic Qualitative Review
Source: PubMed Central journal article supplement (PMC4254603; doi:10.1371/journal.pone.0113274), 2014-12-03
Supplement: pone.0113274.s002.pdf [file pone.0113274.s002.pdf]

## Supporting Information 1

Assessment matrix. The matrix used to analyze selected studies is structured according to the core aspects of Public Involvement Activities identified by a literature review.

| Item                                                                | Item specification (if relevant)                    | Original text passage | Keyword / Code |
|---------------------------------------------------------------------|-----------------------------------------------------|-----------------------|----------------|
| Reference                                                           |                                                     |                       |                |
| <b>A) General Characteristics</b>                                   |                                                     |                       |                |
| Topic                                                               |                                                     |                       |                |
| Year of PIA conduct                                                 |                                                     |                       |                |
| Year of Publication                                                 | Online first                                        |                       |                |
| Methodological                                                      | a) Duration                                         |                       |                |
|                                                                     | b) Study participants (N)                           |                       |                |
| Country                                                             |                                                     |                       |                |
| Journal                                                             |                                                     |                       |                |
| <b>B) PIA Concept</b>                                               |                                                     |                       |                |
| PIA Category                                                        | a) consultation                                     |                       |                |
|                                                                     | b) deliberation-participation                       |                       |                |
| Method(s)                                                           |                                                     |                       |                |
| Study objective(s)                                                  |                                                     |                       |                |
| <b>C) Background / Theoretical Framework</b>                        |                                                     |                       |                |
| Reference to previous PIA report / PIA research / guideline / other |                                                     |                       |                |
|                                                                     | a) Previous PIA report                              |                       |                |
|                                                                     | b) PIA research                                     |                       |                |
|                                                                     | c) PIA guideline                                    |                       |                |
|                                                                     | d) Other                                            |                       |                |
| <b>D) Past PIA conduct</b>                                          |                                                     |                       |                |
| Translation                                                         |                                                     |                       |                |
| Evaluation                                                          | a) Evaluation of PIA methodology by PIA researchers |                       |                |
|                                                                     | b) Feedback from study participants                 |                       |                |
| Limitations                                                         | Regarding PIA conduct                               |                       |                |
