# Supplementary material for: Current Practice of Public Involvement Activities in Biomedical Research and Innovation: A Systematic Qualitative Review
Source: PubMed Central journal article supplement (PMC4254603; doi:10.1371/journal.pone.0113274), 2014-12-03
Supplement: pone.0113274.s003.pdf [file pone.0113274.s003.pdf]

## Supporting Information 2

Overview of journals that published selected PIA reports. Sorted according to (1) the number of studies selected from the respective journal and (2) alphabetical order.

| <b>Journal</b>                                | <b>PIA reports (n)</b> |
|-----------------------------------------------|------------------------|
| Social Science and Medicine                   | 7                      |
| Public Understanding of Science               | 4                      |
| American Journal of Medical Genetics          | 3                      |
| Journal of Medical Ethics                     | 3                      |
| Public Health Genomics                        | 3                      |
| Community Genetics                            | 2                      |
| Genetics in Medicine                          | 2                      |
| Health Expectations                           | 2                      |
| Journal of the National Medical Association   | 2                      |
| Pediatrics                                    | 2                      |
| Academic Medicine                             | 1                      |
| American Journal of Bioethics                 | 1                      |
| American Journal of Health Behaviour          | 1                      |
| American Journal of Public Health             | 1                      |
| Biopreservation and Biobanking                | 1                      |
| BMC Medical Ethics                            | 1                      |
| BMC Public Health                             | 1                      |
| Cell Tissue Bank                              | 1                      |
| Comprehensive Psychiatry                      | 1                      |
| Critical Public Health                        | 1                      |
| Ethik in der Medizin                          | 1                      |
| Journal of Assisted Reproduction and Genetics | 1                      |
| Journal of Pediatrics                         | 1                      |
| Malawi Medical Journal                        | 1                      |
| North Carolina Medical Journal                | 1                      |
| Population Health Management                  | 1                      |
| Scandinavian Journal of Public Health         | 1                      |
| Zeitschrift für Gesundheitspsychologie        | 1                      |
