# Supplementary material for: Current Practice of Public Involvement Activities in Biomedical Research and Innovation: A Systematic Qualitative Review
Source: PubMed Central journal article supplement (PMC4254603; doi:10.1371/journal.pone.0113274), 2014-12-03
Supplement: pone.0113274.s004.pdf [file pone.0113274.s004.pdf]

### **Supporting Information 3**

Search strategy for search in PubMed

Step 1

((("biomedical research"[mesh]) OR (((("Nanomedicine"[Mesh]) OR "Individualized Medicine"[Mesh]) OR "Genetic Therapy"[Mesh]) OR (((("Biotechnology"[Mesh]) OR "Cell Engineering"[Mesh]) OR "Tissue Banks"[Mesh]) OR "Synthetic Biology"[Mesh]) OR "Regenerative Medicine"[Mesh])))

Step 2

((("Consumer Participation") OR (((("public engagement") OR "public participation") OR "public involvement") OR "public deliberation") OR "public consultation") OR "Consumer Participation"[Mesh])))

Step 1 and Step 2
